# Supplementary material for: A validated liquid chromatography-tandem mass spectrometric method for the determination of co-administered ranitidine and metronidazole in plasma of human volunteers
Source: Royal Society of Chemistry journal article supplement (doi:10.1039/d1ay00284h), 2021-01-01
Supplement: d1ay00284h1.pdf [file d1ay00284h1.pdf]

## Supplementary data

### **A validated liquid chromatography–tandem mass spectrometric method for determination of co-administered ranitidine and metronidazole in plasma of Human Volunteers**

Omnia A. El-Naem<sup>1</sup>, Christine M. El-Maraghy<sup>1\*</sup>

<sup>1</sup>Analytical Chemistry Department, Faculty of Pharmacy, October University for Modern Sciences and Arts (MSA), 11787, 6th October City, Egypt

\* Author for correspondence:

Christine Maged El-Maraghy

Tel.: +20 1223553561,

E-mail:Christine\_elmaraghy@hotmail.com

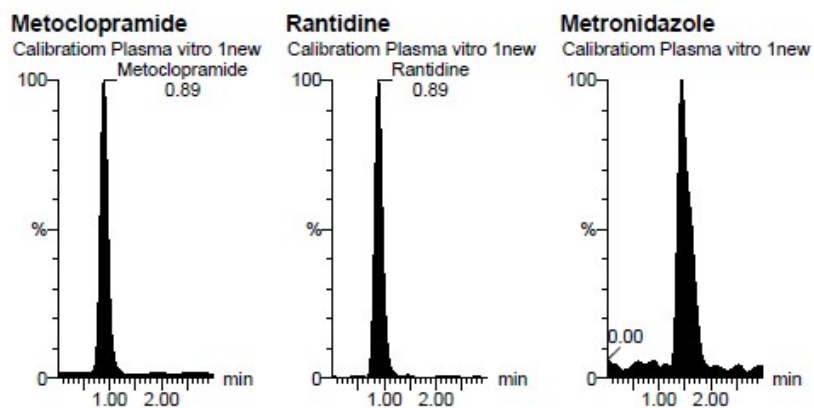

Figure S1: LC-MS/MS chromatograms of plasma spiked with Metronidazole, Rantidine and Metoclopramide (IS) using UPLC-BEH C<sub>18</sub> column (2.1×50 mm, 1.7 μm)

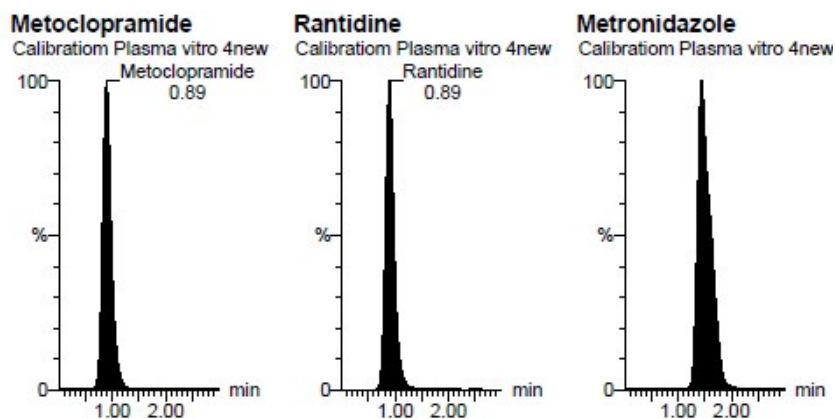

Figure S2: LC-MS/MS chromatograms of plasma spiked with Metronidazole, Rantidine and Metoclopramide (IS) using Symmetry<sup>®</sup> C<sub>18</sub> column (4.6 mm×50 mm, 3.5 μm)
